# Supplementary material for: Hollow Particles Obtained by Prilling and Supercritical Drying as a Potential Conformable Dressing for Chronic Wounds
Source: MDPI journal article supplement (doi:10.3390/gels9060492), 2023-06-16
Supplement: s1 [file s1]

## Supplementary materials

**Table S1.** All parameters prilling process parameters tested for the production of core-shell particles. F is the Frequency, FR<sub>ALG</sub> and FR<sub>emulsion</sub> are respectively the flow rates of the alginate solution and the emulsion, A is amplitude, and H<sub>2</sub>O and EtOH are gelling baths (respectively aqueous and ethanolic).

| Batch (#) | ALG (w/v) % | Keto-profen Lysinate (w/w) % | FR <sub>ALG</sub> (Bar) | FR <sub>emulsion</sub> (mL/min) | F (Hz) | Inner/outer nozzle (μm) | Falling distance (cm) | Electrode (V) | Gelling bath (CaCl <sub>2</sub> 0.3M) | A | Sphericity | Co-axiality |
|-----------|-------------|------------------------------|-------------------------|---------------------------------|--------|-------------------------|-----------------------|---------------|---------------------------------------|---|------------|-------------|
| 1         | 1.5         | -                            | 47                      | 4.87                            | 300    | 450/900                 | 15                    | -             | H <sub>2</sub> O                      | 5 | 0          | 0           |
| 2         | 1.5         | -                            | 90                      | 4.87                            | 340    | 450/900                 | 15                    | -             |                                       |   | 0          | 0           |
| 3         | 1.5         | -                            | 75                      | 4.87                            | 340    | 450/900                 | 15                    | -             |                                       |   | 1          | 0           |
| 4         | 1.5         | -                            | 60                      | 4.87                            | 340    | 450/900                 | 15                    | -             |                                       |   | 0          | 0           |
| 5         | 1.5         | -                            | 88                      | 4.87                            | 320    | 450/900                 | 15                    | -             |                                       |   | 0          | 0           |
| 6         | 1.5         | -                            | 54                      | 4.87                            | 280    | 450/900                 | 15                    | -             |                                       |   | 0          | 0           |
| 7         | 1.5         | -                            | 100                     | 4.87                            | 340    | 450/900                 | 15                    | -             |                                       |   | 0          | 0           |
| 8         | 1.5         | -                            | 75                      | 4.87                            | 340    | 450/900                 | 10                    | -             |                                       |   | 0          | 0           |
| 9         | 1.5         | -                            | 60                      | 4.87                            | 340    | 450/900                 | 10                    | -             |                                       |   | 0          | 0           |
| 10        | 1.5         | -                            | 100                     | 4.87                            | 340    | 450/900                 | 10                    | -             |                                       |   | 0          | 0           |
| 11        | 1.5         | -                            | 100                     | 5.00                            | 340    | 450/600                 | 10                    | -             |                                       |   | 0          | 0           |
| 12        | 1.5         | -                            | 84                      | 5.00                            | 340    | 450/600                 | 10                    | -             |                                       |   | 0          | 0           |
| 13        | 1.5         | -                            | 54                      | 5.00                            | 340    | 450/600                 | 10                    | -             |                                       |   | 1          | 0           |
| 14        | 1.5         | -                            | 75                      | 4.87                            | 340    | 450/900                 | 4.5                   | 500           |                                       |   | 0          | 0           |
| 15        | 2.0         | -                            | 75                      | 4.87                            | 340    | 450/900                 | 4.5                   | 1000-1500     | H <sub>2</sub> O                      | 5 | 0          | 0           |
| 16        | 2.0         | -                            | 120                     | 4.87                            | 340    | 450/900                 | 4.5                   | 1500-2000     |                                       |   | 0          | 0           |
| 17        | 1.75        | -                            | 101                     | 4.87                            | 340    | 450/900                 | 4.5                   | 2500          |                                       |   | 0          | 0           |
| 18        | 1.75        | -                            | 112                     | 4.87                            | 340    | 450/900                 | 4.5                   | 2000-2500     |                                       |   | 0          | 0           |
| 19        | 1.75        | -                            | 140                     | 4.87                            | 340    | 300/700                 | 4.5                   | 2500          |                                       |   | 0          | 0           |
| 20        | 1.75        | -                            | 96                      | 5.00                            | 340    | 300/700                 | 4.5                   | 2500          |                                       |   | 0          | 0           |
| 21        | 1.75        | -                            | 75                      | 4.87                            | 340    | 450/900                 | 4.5                   | -             |                                       |   | 1          | 0           |
| 22        | 1.75        | -                            | 96                      | 4.87                            | 340    | 450/900                 | 4.5                   | -             |                                       |   | 1          | 0           |
| 23        | 1.75        | -                            | 96                      | 4.87                            | 360    | 450/900                 | 4.5                   | -             |                                       |   | 1          | 0           |
| 24        | 1.75        | -                            | 96                      | 4.87                            | 400    | 450/900                 | 4.5                   | -             |                                       |   | 0          | 0           |
| 25        | 1.75        | -                            | 124                     | 6.00                            | 340    | 450/900                 | 4.5                   | -             |                                       |   | 1          | 0           |
| 26        | 1.75        | -                            | 96                      | 6.00                            | 340    | 450/900                 | 4.5                   | -             |                                       |   | 1          | 0           |
| 27        | 1.75        | -                            | 96                      | 6.00                            | 340    | 450/900                 | 5.0                   | -             |                                       |   | 0          | 0           |
| 28        | 1.75        | -                            | 96                      | 6.00                            | 340    | 450/900                 | 5.0                   | 2500          |                                       |   | 0          | 0           |

|    |      |      |     |      |     |         |     |      |      |   |   |
|----|------|------|-----|------|-----|---------|-----|------|------|---|---|
| 29 | 1.75 | -    | 96  | 6.00 | 360 | 450/900 | 4.5 | -    | EtOH | 0 | 0 |
| 30 | 1.75 | 10.0 | 96  | 6.00 | 340 | 450/900 | 4.5 | -    |      | 1 | 0 |
| 31 | 1.75 | 10.0 | 96  | 6.00 | 340 | 450/900 | 5.0 | -    |      | 1 | 0 |
| 32 | 1.75 | 10.0 | 124 | 6.00 | 340 | 450/900 | 4.5 | 2500 |      | 0 | 0 |
| 33 | 1.75 | 1.0  | 96  | 6.00 | 340 | 450/900 | 4.5 | -    |      | 1 | 0 |
| 34 | 1.75 | -    | 96  | 6.00 | 340 | 450/900 | 3.0 | -    |      | 1 | 1 |
| 35 | 1.75 | -    | 75  | 4.87 | 340 | 450/900 | 3.0 | -    |      | 0 | 0 |
| 36 | 1.75 | -    | 75  | 6.00 | 340 | 450/900 | 3.0 | -    |      | 0 | 0 |
| 37 | 1.75 | 5.0  | 96  | 6.00 | 340 | 450/900 | 4.5 | -    |      | 0 | 0 |
| 38 | 1.75 | 5.0  | 75  | 6.00 | 340 | 450/900 | 3.0 | -    |      | 0 | 0 |
| 39 | 1.75 | 10.0 | 96  | 6.00 | 340 | 450/900 | 3.0 | -    | 5    | 1 | 1 |
| 40 | 1.75 | 10.0 | 75  | 4.87 | 340 | 450/900 | 3.0 | -    |      | 0 | 0 |
| 41 | 1.75 | 20.0 | 96  | 6.00 | 340 | 450/900 | 4.5 | -    |      | 0 | 0 |
| 42 | 1.75 | 20.0 | 96  | 6.00 | 340 | 450/900 | 3.0 | -    |      | 1 | 1 |
| 43 | 1.75 | 25.0 | 96  | 6.00 | 340 | 450/900 | 4.5 | -    |      | 1 | 0 |
| 44 | 1.75 | 25.0 | 96  | 6.00 | 340 | 450/900 | 3.0 | -    |      | 1 | 0 |
| 45 | 1.75 | 5.0  | 96  | 6.00 | 340 | 450/900 | 3.0 | -    |      | 1 | 1 |
| 46 | 2.25 | -    | 105 | 6.00 | 340 | 450/900 | 3.0 | -    |      | 0 | 0 |
| 47 | 2.25 | -    | 120 | 4.87 | 340 | 450/900 | 3.0 | -    |      | 0 | 0 |
| 48 | 2.25 | -    | 150 | 6.00 | 340 | 450/900 | 3.0 | -    |      | 1 | 1 |
| 49 | 2.25 | 5.0  | 150 | 6.00 | 340 | 450/900 | 3.0 | -    |      | 1 | 1 |
| 50 | 2.25 | 10.0 | 150 | 6.00 | 340 | 450/900 | 3.0 | -    |      | 1 | 1 |
| 51 | 2.25 | 20.0 | 150 | 6.00 | 340 | 450/900 | 3.0 | -    |      | 1 | 1 |

*Operating conditions for the production of core-shell microparticles*

For the manufacturing of core-shell loaded-microparticles, aqueous alginate solutions (Russo et al., 2020) at different concentrations (1.50% - 2.25%, (w/v)) were used to form the shell of the gel beads and an (O/W/O) emulsion was used to form the core. A primary O/W emulsion was formed by 1 mL dichloromethane and a 15 mL  $\text{CaCl}_2$  aqueous solution at different concentrations, between 13.4 g/L and 26.8 g/L, while different percentages of PVA (0.5% - 1.0%, (w/v)) were used as a surfactant in the aqueous phase. This primary emulsion was added to 30 mL sunflower oil containing 0.5-1.0% Span® 85 (v/v) under gentle magnetic stirring. For the production of drug-loaded microparticles, ketoprofen lysinate was added in the range of 1% - 25% (w/w) regarding the amount of polymer used. Alginate capsules were prepared using a prilling apparatus (Encapsulator B-360, Büchi Labortechnik AG, St. Gallen, Switzerland) and to manufacture uniform core-shell beads in a narrow size distribution, concentric nozzles of different diameters were tested: inner nozzle ranging from 300 to 450  $\mu\text{m}$  and outer nozzle ranging to 600 to 900  $\mu\text{m}$ . The alginate solutions flow rate was tested in the 47-150 bar range whereas the emulsion flow rate was tested in the 4-6 mL/min range. The vibration frequency was tested in the range of 280 Hz-400 Hz, the amplitude was 5, and the use of the electrode was in the range of 500-2500V. Different amounts of ketoprofen lysinate were dissolved into the aqueous phase of the O/W/O emulsion in order to obtain 5%, 10%, and 20% (w/w) drug-loaded emulsions. The obtained gel beads were collected in a 0.3M  $\text{CaCl}_2$  aqueous or ethanolic solution placed at different distances (3-5 cm) from the nozzle exit and maintained under gentle stirring for 5 minutes before being rinsed and collected in water or absolute ethanol, respectively.
